# Supplementary material for: Solvent-Induced Lag Phase during the Formation of Lysozyme Amyloid Fibrils Triggered by Sodium Dodecyl Sulfate: Biophysical Experimental and In Silico Study of Solvent Effects
Source: MDPI journal article supplement (doi:10.3390/molecules28196891), 2023-09-30
Supplement: s1 [file s1]

Supplementary material

# Solvent-Induced Lag Phase during the Formation of Lysozyme Amyloid Fibrils Triggered by Sodium Dodecyl Sulfate: Biophysical Experimental and In Silico Study of Solvent Effects

Gabriel Zazeri <sup>1,ψ,ξ</sup>, Ana Paula Ribeiro Povinelli <sup>1,ξ</sup>, Nathália Mariana Pavan <sup>3</sup>, Alan M. Jones <sup>2,ψ</sup> and Valdecir Farias Ximenes <sup>3,ψ</sup>

- 1 Federal Institute of Education, Science and Technology of Mato Grosso IFMT, Mato Grosso, Campo Novo do Parecis 78360-000, Brazil; anapovinelli@outlook.com
  - 2 School of Pharmacy, Institute of Clinical Sciences, College of Medical and Dental Sciences, University of Birmingham, Edgbaston, Birmingham B15 2TT, UK
  - 3 Department of Chemistry, Faculty of Sciences, UNESP—São Paulo State University, Bauru 17033-360, Brazil; nathalia.pavan@unesp.br
- ψ Correspondence: gabriel.zazeri@outlook.com (G.Z.); a.m.jones.2@bham.ac.uk (A.M.J.); valdecir.ximenes@unesp.br (V.F.X.)
- ξ Current address: Department of Chemistry, Institute of Chemistry, University of Campinas UNICAMP, Campinas 13083-970, Brazil.

**Citation:** Zazeri, G.; Povinelli, A.P.R.; Pavan, N.M.; Jones, A.M.; Ximenes, V.F. Solvent-Induced Lag Phase during the Formation of Lysozyme Amyloid Fibrils Triggered by Sodium Dodecyl Sulfate: Biophysical Experimental and In Silico Study of Solvent Effects. *Molecules* **2023**, *28*, 6891. <https://doi.org/10.3390/molecules28196891>

Academic Editors: Filipe Menezes, Grzegorz Popowicz and Carmelo La Rosa

Received: 5 September 2023  
Revised: 20 September 2023  
Accepted: 28 September 2023  
Published: 30 September 2023

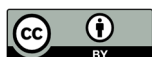

**Copyright:** © 2023 by the authors. Licensee MDPI, Basel, Switzerland. This article is an open access article distributed under the terms and conditions of the Creative Commons Attribution (CC BY) license (<https://creativecommons.org/licenses/by/4.0/>).

| Solvents        | LogP  | Solubility in water w/w) | Boiling point (°C) | Dielectric constant |
|-----------------|-------|--------------------------|--------------------|---------------------|
| Acetone         | −0.23 | 100                      | 56                 | 20.7                |
| Ethanol         | −0.24 | 100                      | 78                 | 24.3                |
| Acetonitrile    | −0.33 | 100                      | 82                 | 36.2                |
| Tetrahydrofuran | 0.49  | 100                      | 65                 | 6.4                 |

Table S1: Physicochemical characteristics of solvents molecules (Phenomenex table and [doi.org/10.1007/s002160000467](https://doi.org/10.1007/s002160000467))

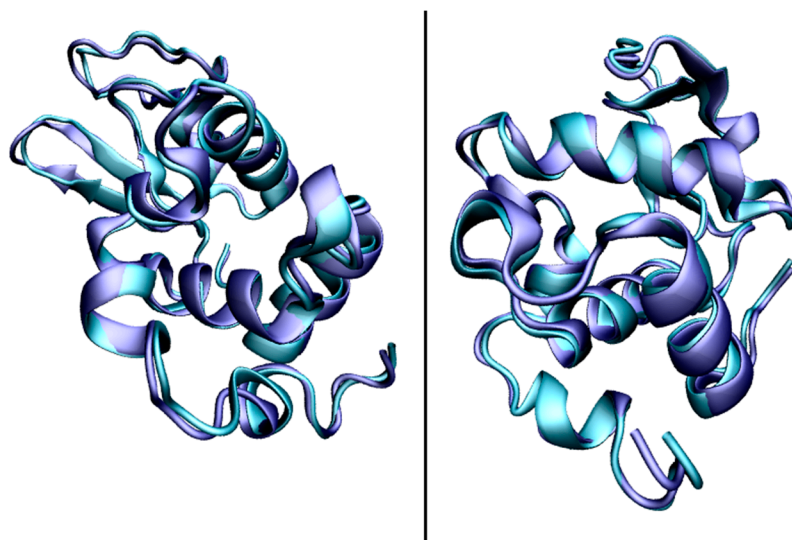

Figure S1: Structural alignment of 1LYZ (Cyan colour) and 1REX (Blue colour) at two different point of views.

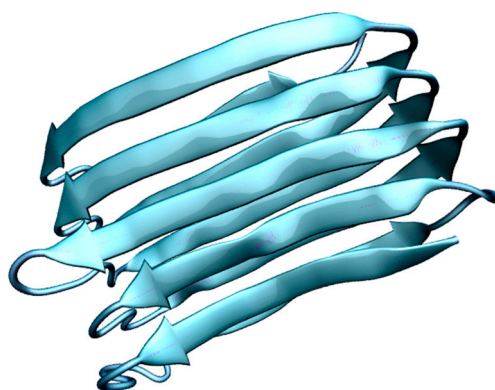

Figure S2: Structural alignment of protofibril of 1LYZ (Cyan colour) and 1REX (Blue colour) .

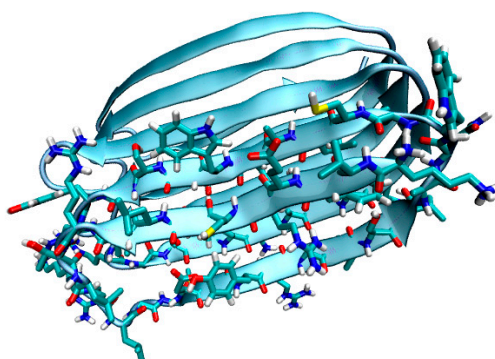

Figure S3: Residues from 1 to 50 of modeled protofibril lysozyme highlighted.

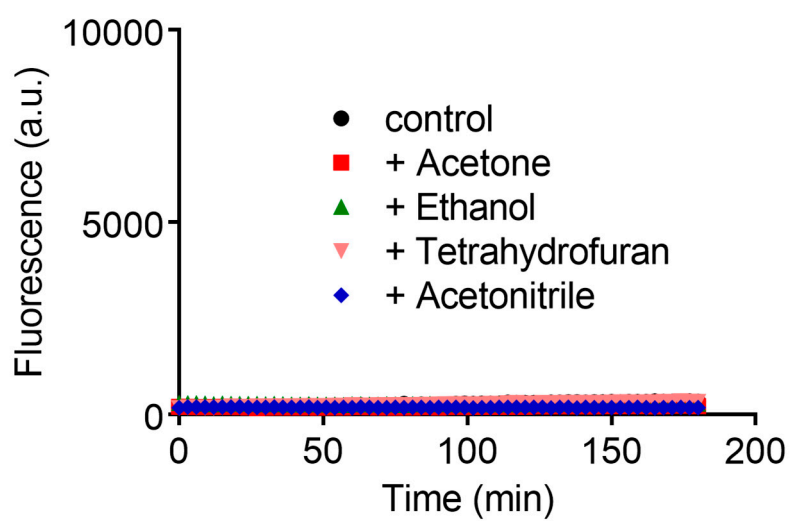

Figure S4: ThT fluorescence in the presence of the different solvents
